# Supplementary material for: Extreme temperatures compromise male and female fertility in a large desert bird
Source: PubMed Central journal article supplement (PMC7854745; doi:10.1038/s41467-021-20937-7), 2021-02-02
Supplement: 41467_2021_20937_MOESM3_ESM.pdf [file 41467_2021_20937_MOESM3_ESM.pdf]

### **Description of Additional Supplementary Files**

File Name: Supplementary Code 1

Description: R code used for statistical analyses
